# Supplementary material for: Workplace Bullying and Mental Health: A Meta-Analysis on Cross-Sectional and Longitudinal Data
Source: PubMed Central journal article supplement (PMC4549296; doi:10.1371/journal.pone.0135225), 2015-08-25

Author(s) and Year

Correlation [95%CI]

**Depression**

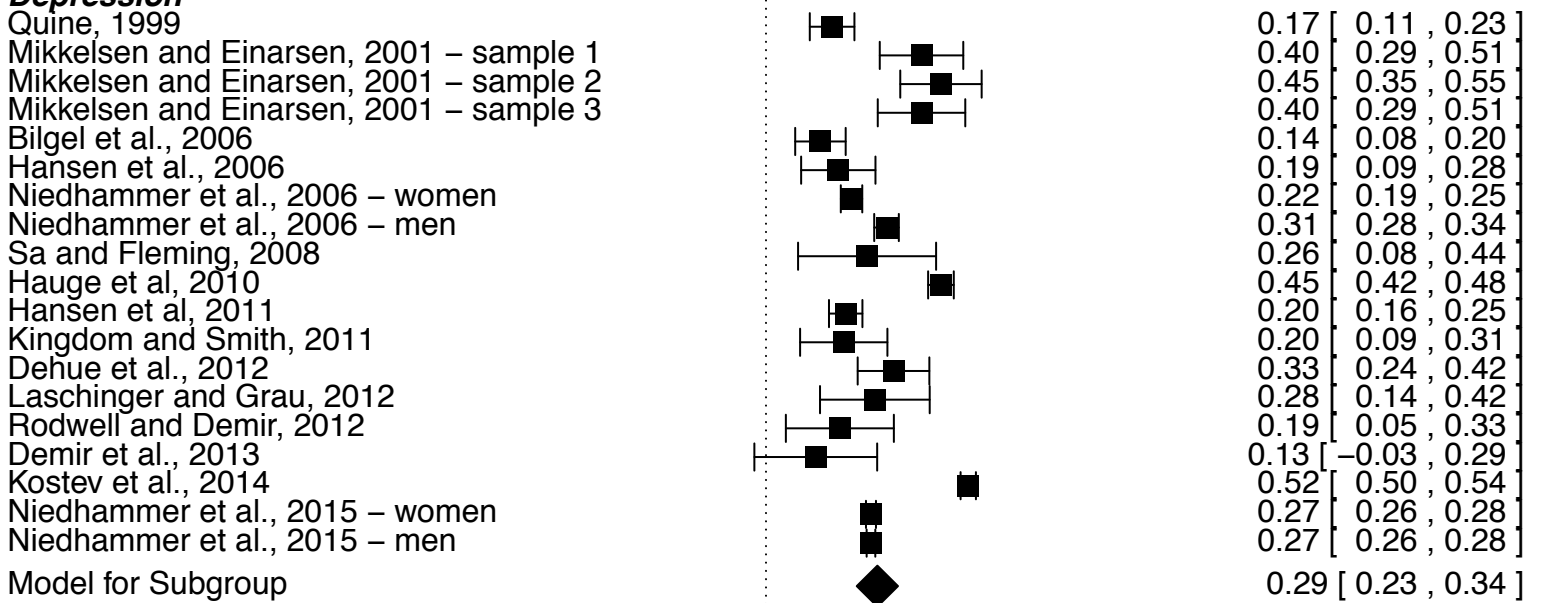

**Anxiety**

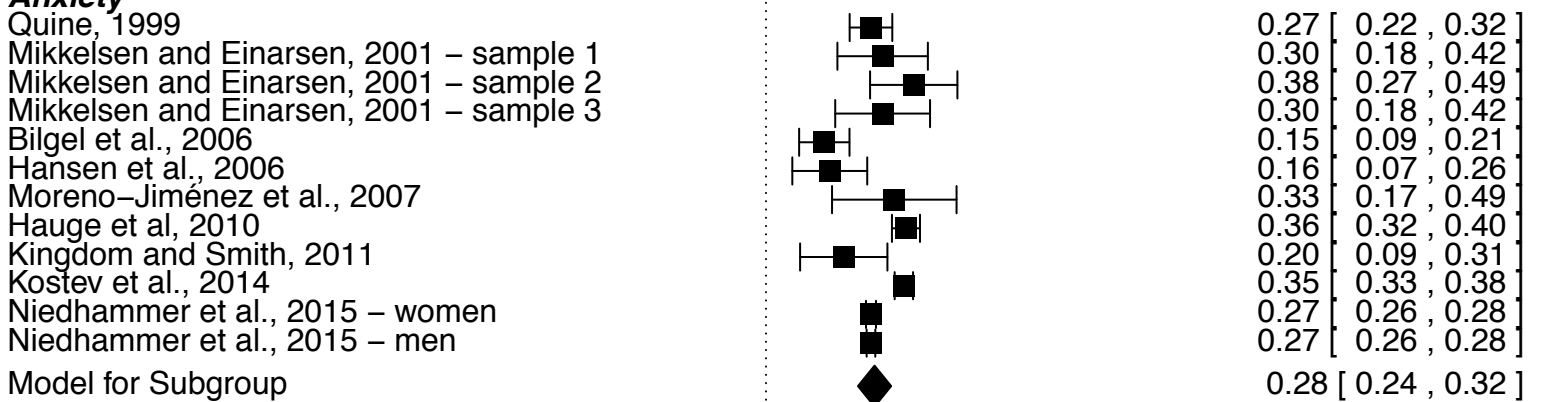

**PTSD**

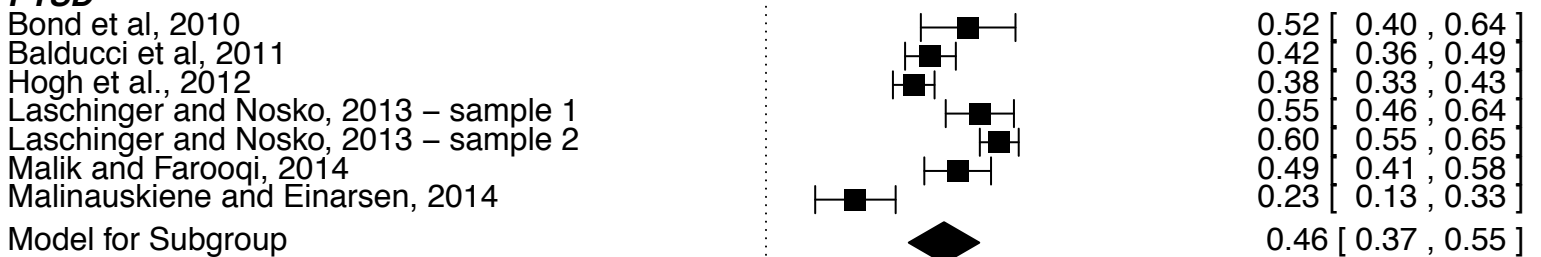

**Stress-related complaints**

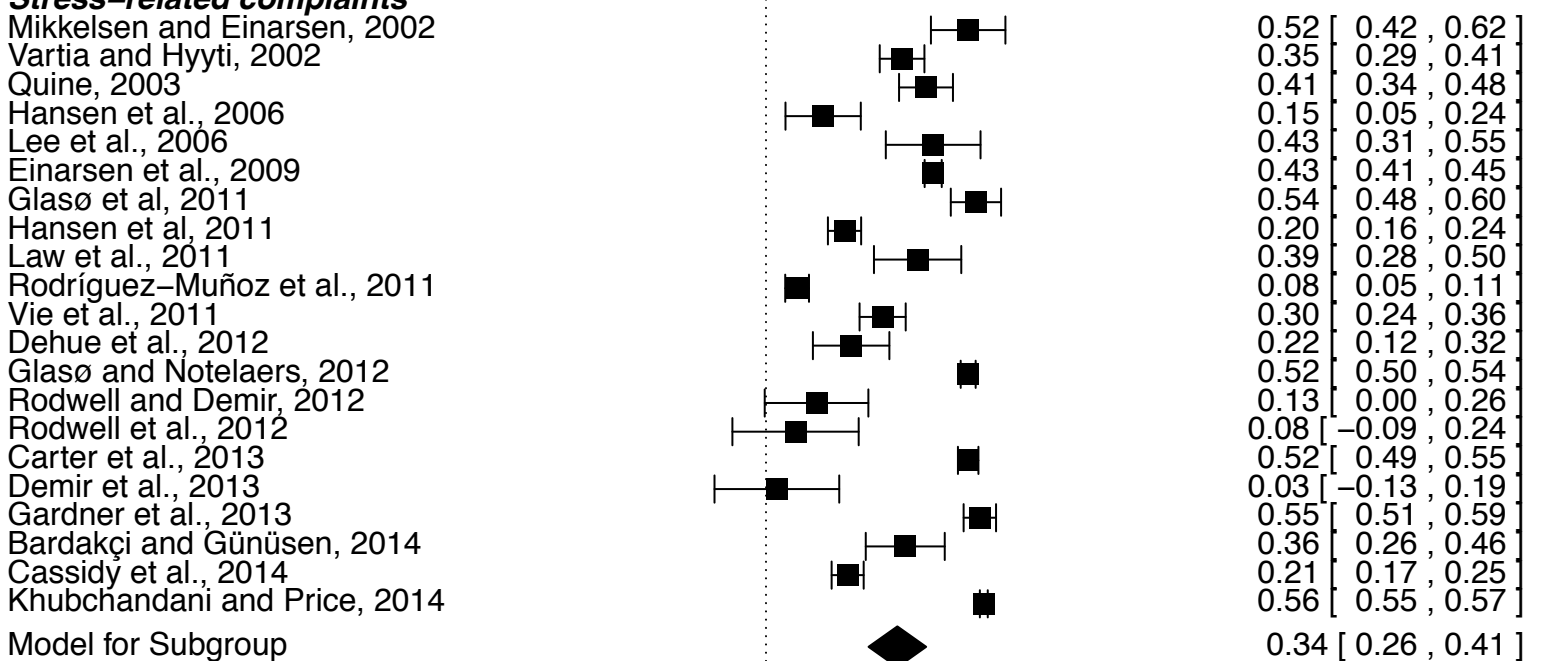

**Burnout**

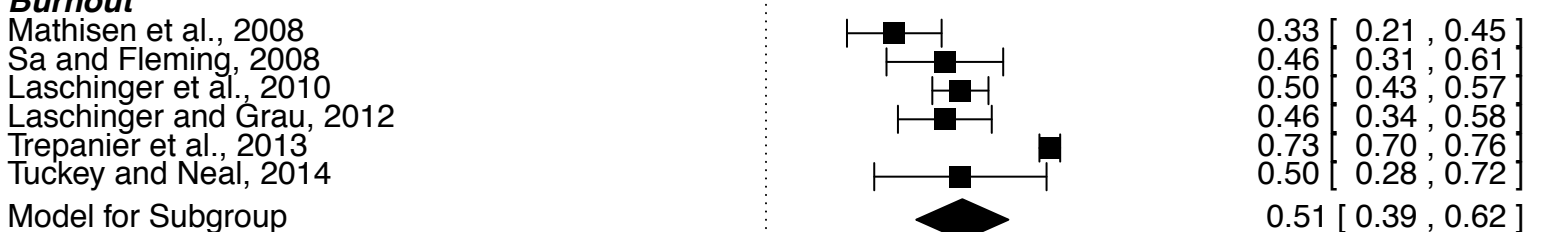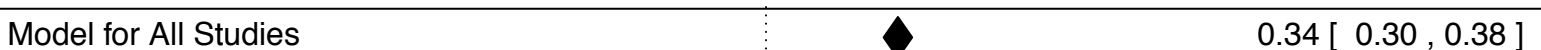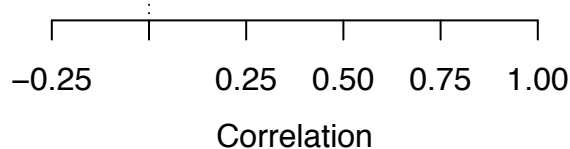

Supplement: pone.0135225.s002.pdf [file pone.0135225.s002.pdf]
