# Supplementary material for: Workplace Bullying and Mental Health: A Meta-Analysis on Cross-Sectional and Longitudinal Data
Source: PubMed Central journal article supplement (PMC4549296; doi:10.1371/journal.pone.0135225), 2015-08-25

**Author(s) and Year**

**Correlation [95% CI]**

***Depression***

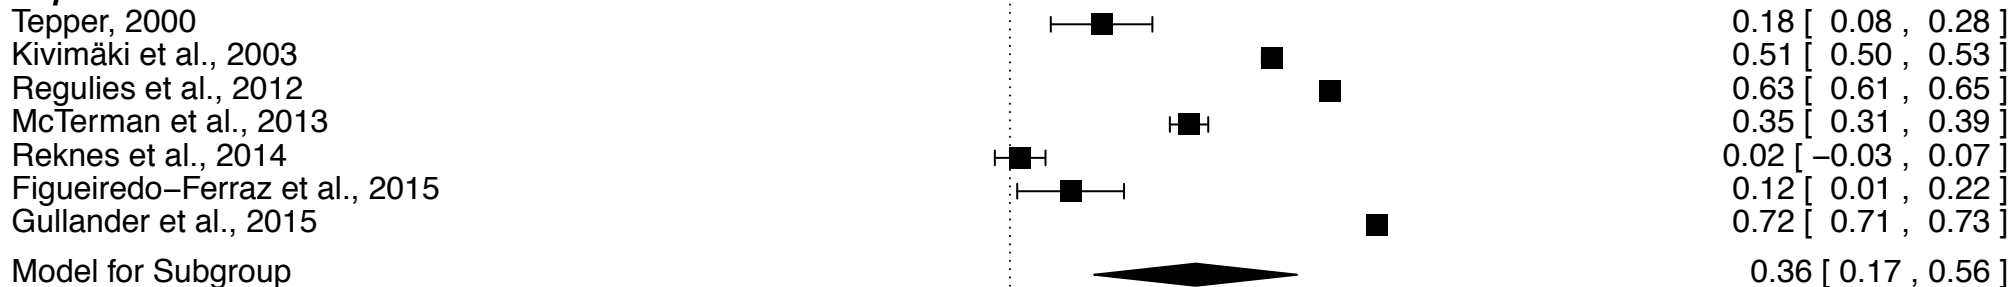

***Anxiety***

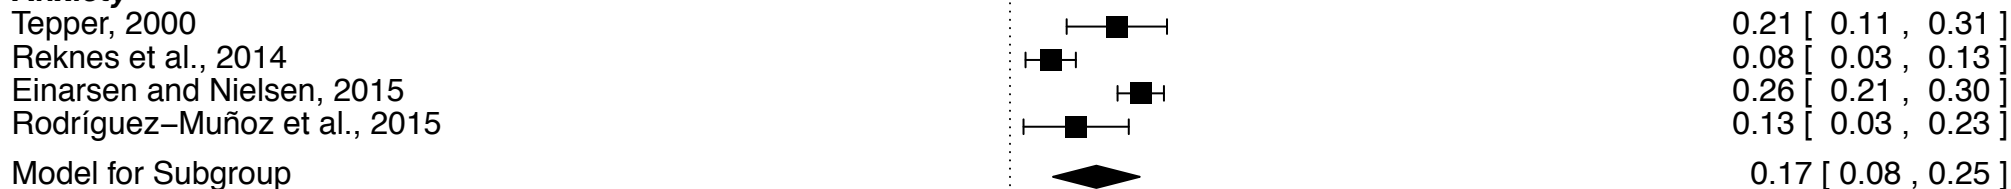

***Stress-related complaints***

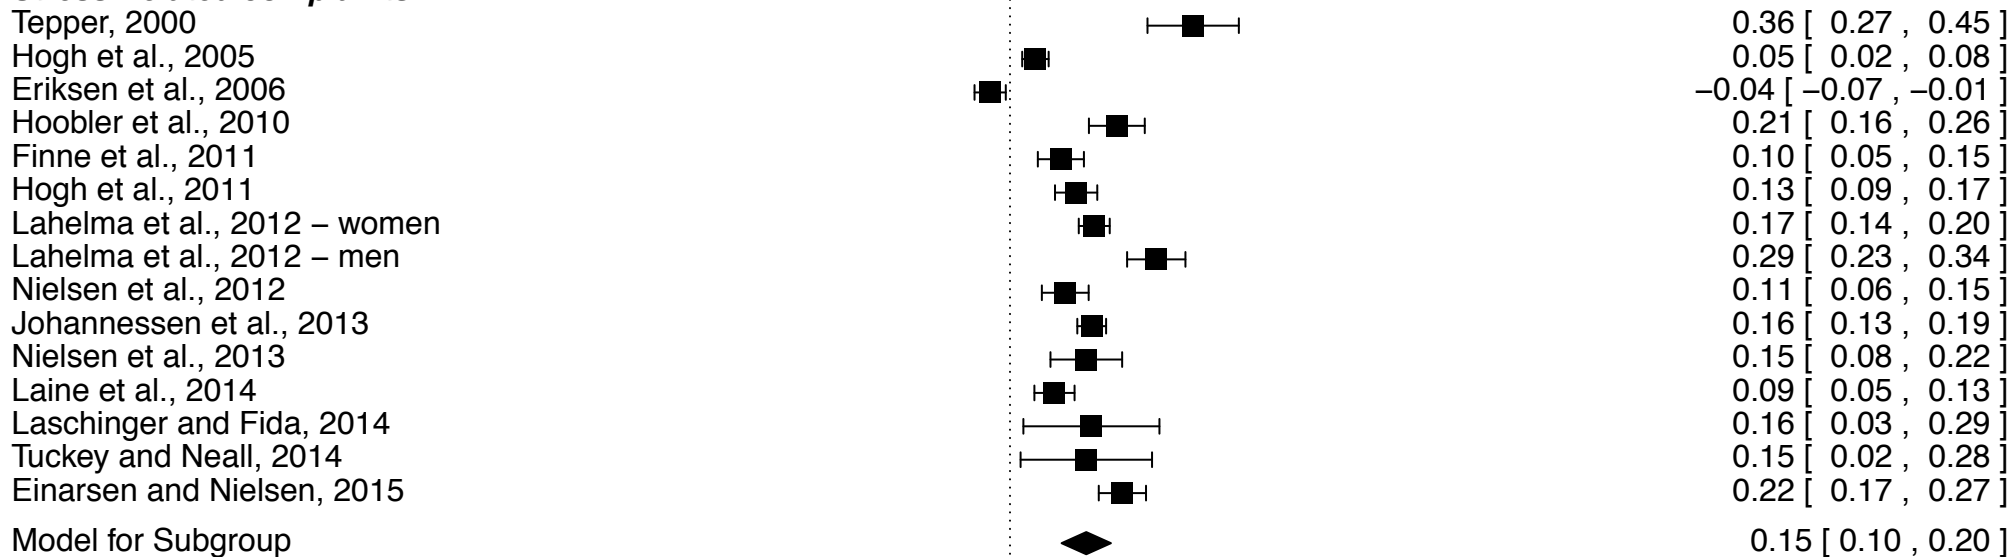

**Model for All Studies**

0.21 [ 0.14 , 0.28 ]

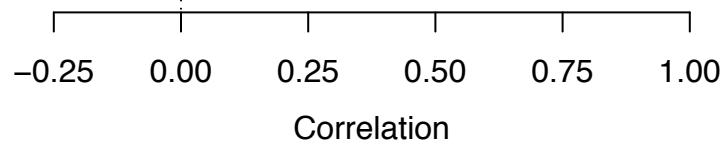

Supplement: pone.0135225.s003.pdf [file pone.0135225.s003.pdf]
