# Supplementary material for: Workplace Bullying and Mental Health: A Meta-Analysis on Cross-Sectional and Longitudinal Data
Source: PubMed Central journal article supplement (PMC4549296; doi:10.1371/journal.pone.0135225), 2015-08-25
Supplement: pone.0135225.s004.pdf [file pone.0135225.s004.pdf]

Author(s) and Year

Correlation [95% CI]

***Depression***

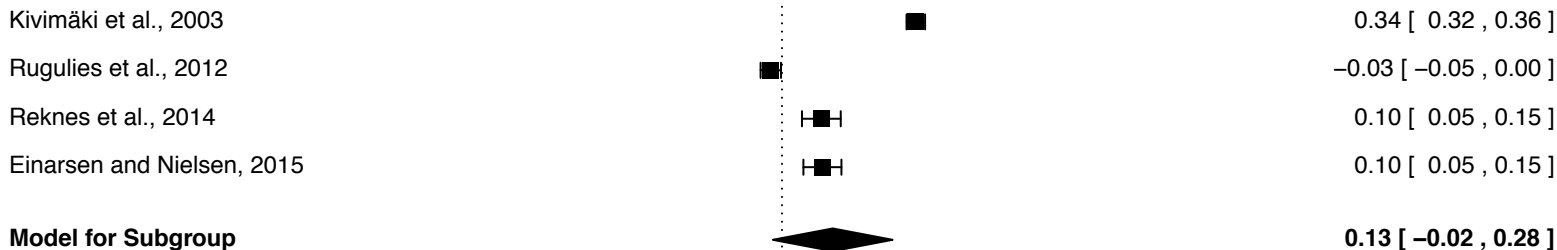

***Anxiety***

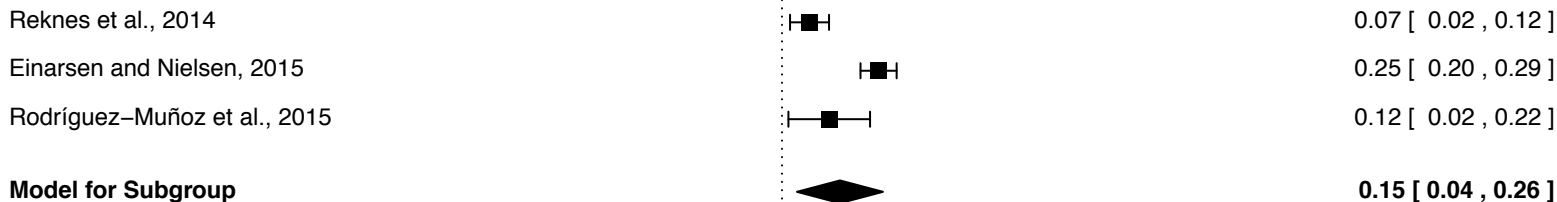

***Stress-related complaints***

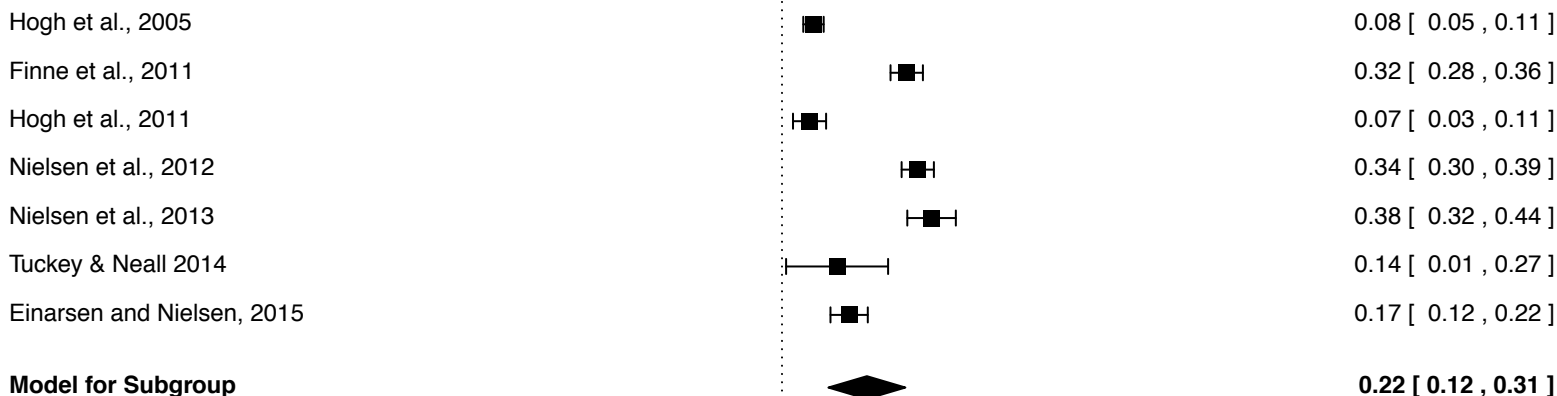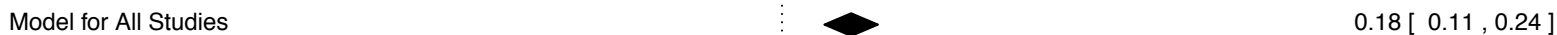

-0.25 0.00 0.25 0.50 0.75 1.00

Correlation
